# Supplementary material for: Mediterranean‐Style Diet and Risk of Preeclampsia by Race in the Boston Birth Cohort
Source: PubMed Central journal article supplement — J Am Heart Assoc. 2022 Apr 20;11(9):e022589. doi: 10.1161/JAHA.121.022589 (PMC9238615; doi:10.1161/jaha.121.022589), 2022-04-20
Supplement: JAH3-11-e022589-s001.pdf [file JAH3-11-e022589-s001.pdf]

# **SUPPLEMENTAL MATERIAL**

**Table S1. Unadjusted and Adjusted Odds of Preeclampsia for Various Risk Factors.**

|                                                            | Unadjusted Odds<br>Ratio (95% CI) | p-value | Adjusted* Odds<br>Ratio (95% CI) | p-value |
|------------------------------------------------------------|-----------------------------------|---------|----------------------------------|---------|
| Age (per year increase)                                    | 1.30 (1.17-1.44)                  | <0.001  | 1.02 (1.01-1.03)                 | 0.002   |
| Black race (REF: white)                                    | 1.70 (1.31-2.21)                  | <0.001  | 1.32 (1.00-1.75)                 | 0.049   |
| Ever smoker during<br>pregnancy<br>(REF: never smoker)     | 0.71 (0.58-0.87)                  | 0.001   | 0.75 (0.60-0.93)                 | 0.009   |
| Chronic hypertension                                       | 9.00 (7.33-11.04)                 | <0.001  | 7.61 (6.08-9.51)                 | <0.001  |
| Prior diabetes                                             | 2.17 (1.62-2.92)                  | <0.001  | 1.16 (0.83-1.62)                 | 0.40    |
| Pre-pregnancy obesity                                      | 2.07 (1.76-2.42)                  | <0.001  | 1.66 (1.40-1.98)                 | <0.001  |
| Unmarried (REF:<br>married)                                | 0.96 (0.83-1.12)                  | 0.62    | 1.02 (0.86-1.21)                 | 0.80    |
| No school/elementary<br>school (REF: College or<br>higher) | 1.01 (0.84-1.21)                  | 0.94    | 0.81 (0.66-0.99)                 | 0.038   |

\*Fully adjusted model included maternal age, race, parity, smoking in pregnancy, chronic hypertension, diabetes, pre-pregnancy obesity, marital status and educational level.

**Table S2. Adjusted\* Odds Ratios of Preeclampsia according to Joint Categories of Mediterranean-style Diet Score (MSDS) and Race.**

|                                 | Adjusted Odds Ratio<br>(95% CI) | p-value |
|---------------------------------|---------------------------------|---------|
| MSDS Tertile 3 + Non-Black Race | REF                             | REF     |
| MSDS Tertile 2 + Non-Black Race | 0.88 (0.65-1.18)                | 0.38    |
| MSDS Tertile 1 + Non-Black Race | 1.18 (0.89-1.57)                | 0.25    |
| MSDS Tertile 3 + Black Race     | 1.25 (0.84-1.86)                | 0.27    |
| MSDS Tertile 2 + Black Race     | 1.22 (0.81-1.83)                | 0.35    |
| MSDS Tertile 1 + Black Race     | 1.72 (1.16-2.55)                | 0.006   |

\*Fully adjusted model included maternal age, race, education, marital status, smoking in pregnancy, parity, and pre-pregnancy obesity.

**Table S3. Association of Mediterranean-style diet score with preeclampsia in nulliparous women only.**

| Mediterranean style diet score (MSDS) | Preeclampsia cases/<br>total participants<br>(n=618/7770) | Unadjusted model,<br>Odds ratio<br>(95% CI) | Multivariable model,<br>Odds ratio<br>(95% CI) |
|---------------------------------------|-----------------------------------------------------------|---------------------------------------------|------------------------------------------------|
| Tertile 1                             | 234/2569 (9%)                                             | Referent                                    | Referent                                       |
| Tertile 2                             | 170/2420 (7%)                                             | 0.75 (0.61-0.93)                            | 0.71 (0.54-0.94)                               |
| Tertile 3                             | 214/2781(8%)                                              | 0.83 (0.68-1.01)                            | 0.70 (0.53-0.92)                               |

\*Variables included in multivariable model: Maternal age, race, education, marital status, smoking in pregnancy, and pre-pregnancy obesity.
